# Supplementary figures and images for: Amino Acids 785, 787 of the Na+/H+ Exchanger Cytoplasmic Tail Modulate Protein Activity and Tail Conformation
Source: MDPI journal article supplement (doi:10.3390/ijms222111349), 2021-10-21

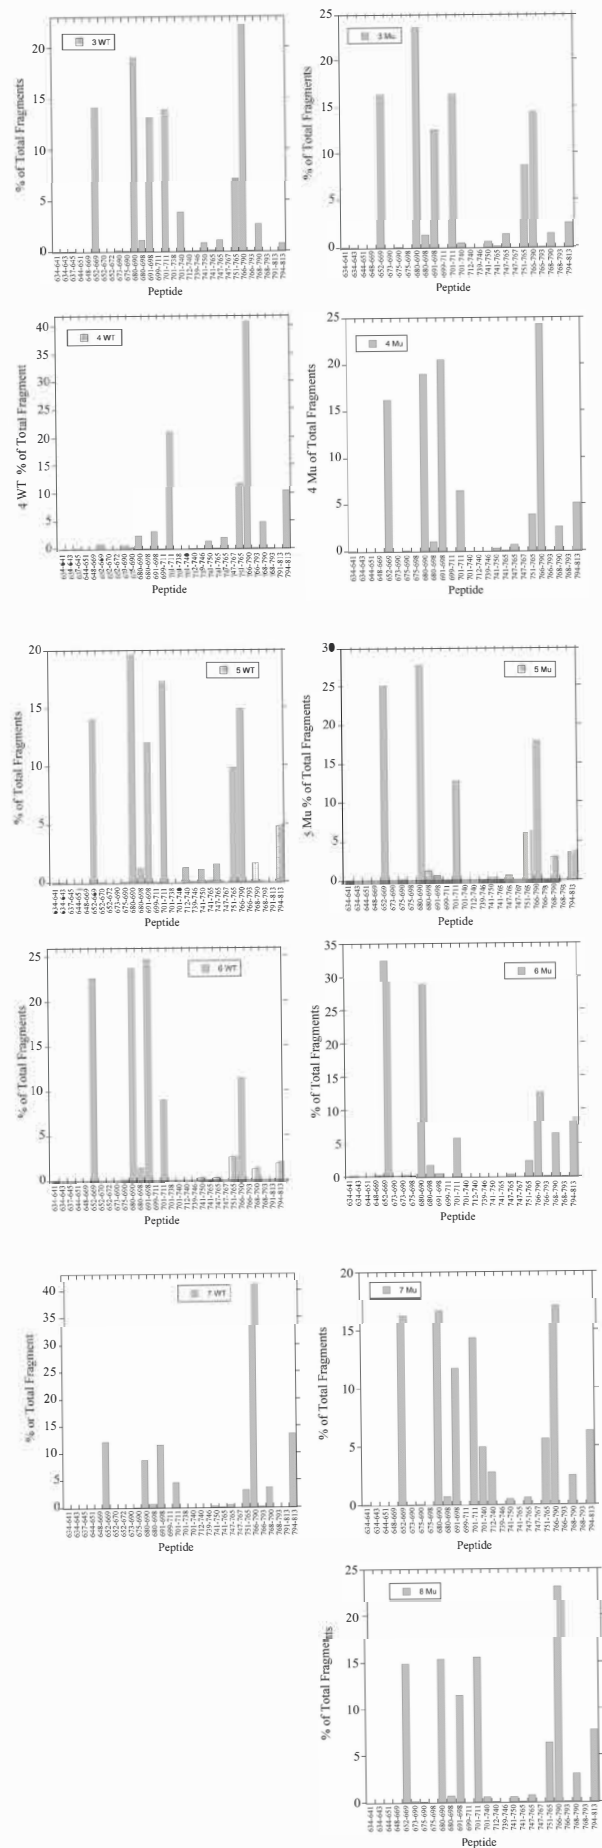

Figure S1. Fragmentation analysis of protein bands.

Supplement: s1 [file s1]
